# Supplementary material
Source: Springer Nature journal article supplement (https://www.springermedizin.de/resource/supplementary/12943_2013_1180_MOESM3_ESM.pdf/9552244)

**A**CL1  
↓

5'-P-GAAAAAAGACTTAG-3'

3'- CT TT TT TCTGAATCTTTTAAAAAT-5'

Wild-type

Glu710Gly

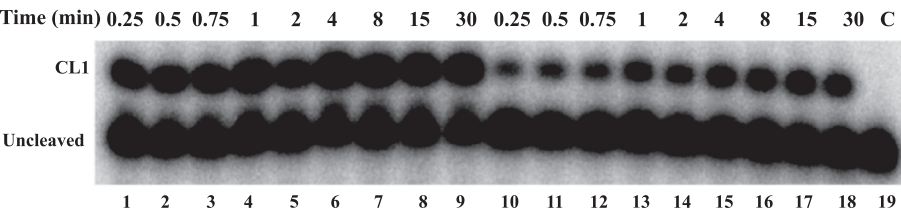**B**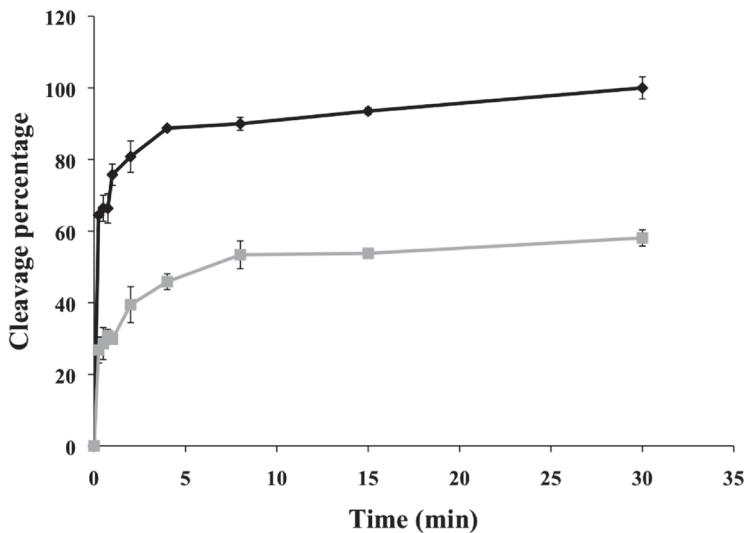

Supplement: MOESM3 [file 9552244]
